# Supplementary material for: A Novel Class of Mammalian-Specific Tailless Retropseudogenes
Source: HighWire-hosted journal article supplement (doi:10.1101/gr.2720104), 2004-09-13
Supplement: Schmitz_Fig1supp.pdf [file Schmitz_Fig1supp.pdf]

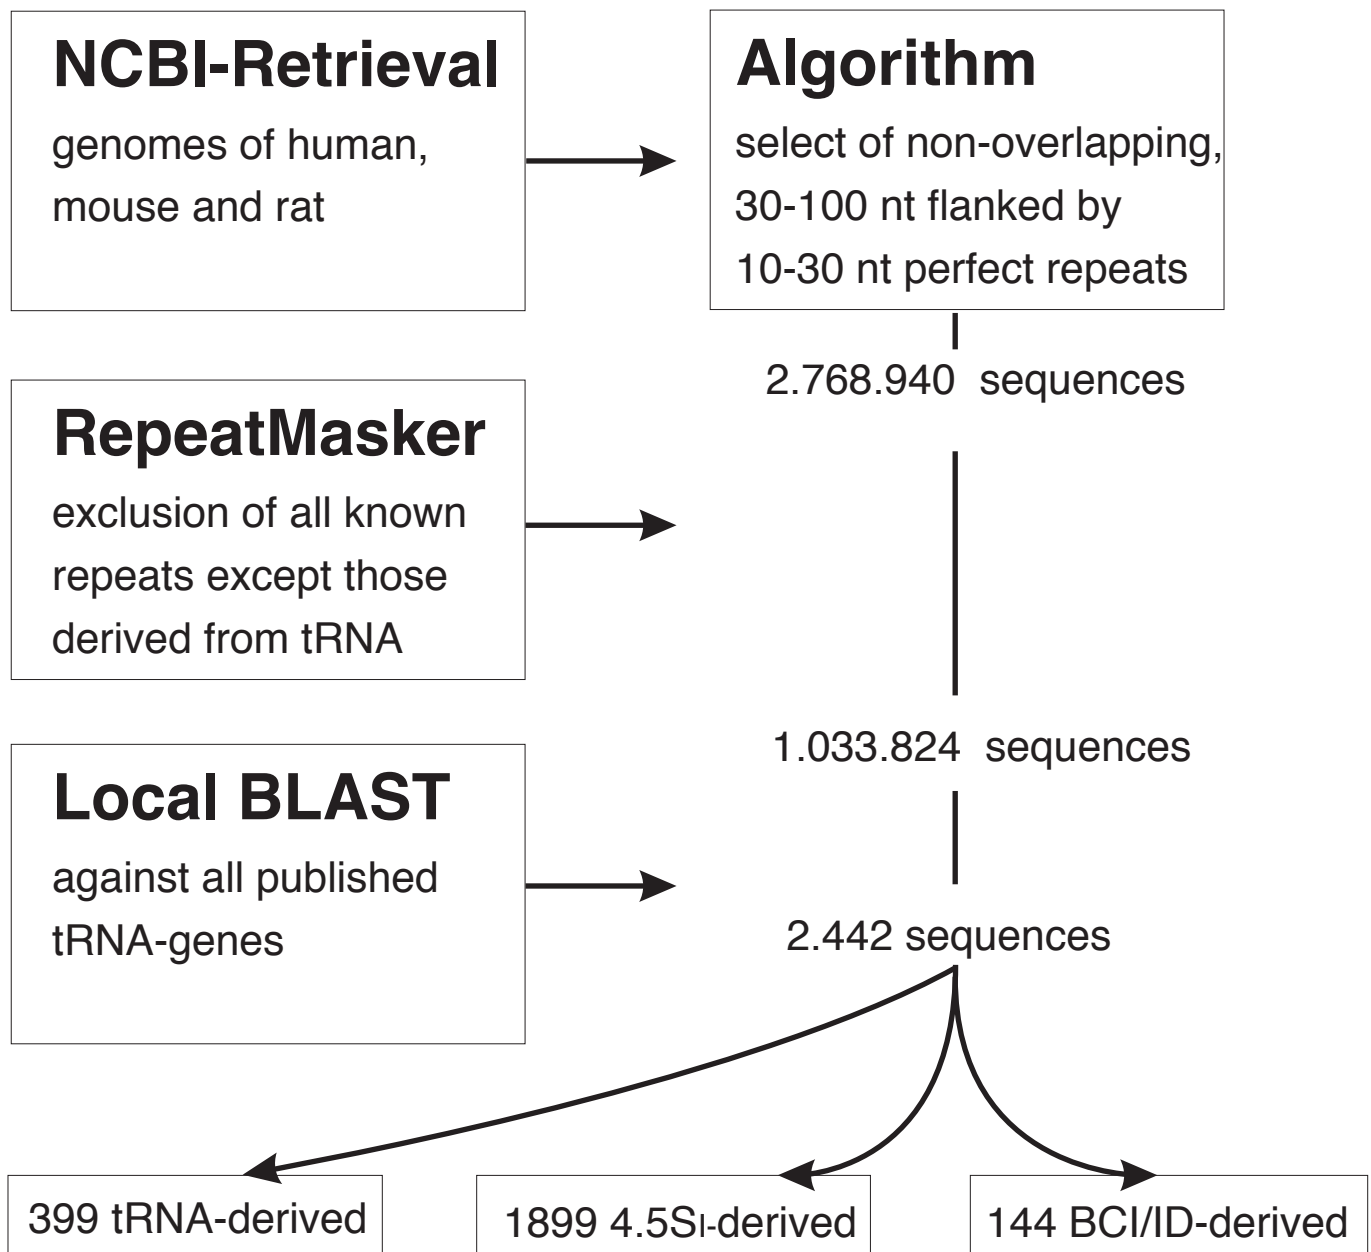

**Supplementary Figure 1: Flow chart of the computational strategy**

We wrote a computer algorithm in C programming language to extract from GenBank sequences of 30 to 100 nucleotides in length that are flanked by at least 10 nt-long perfect direct repeats. Note: Because of the search restrictions as shown in the upper right box, the numbers of selectively extracted tailless retropseudogenes only represent a fraction of the total genomic numbers.
