# Supplementary material for: A Novel Class of Mammalian-Specific Tailless Retropseudogenes
Source: HighWire-hosted journal article supplement (doi:10.1101/gr.2720104), 2004-09-13
Supplement: Schmitz_Fig3supp.pdf [file Schmitz_Fig3supp.pdf]

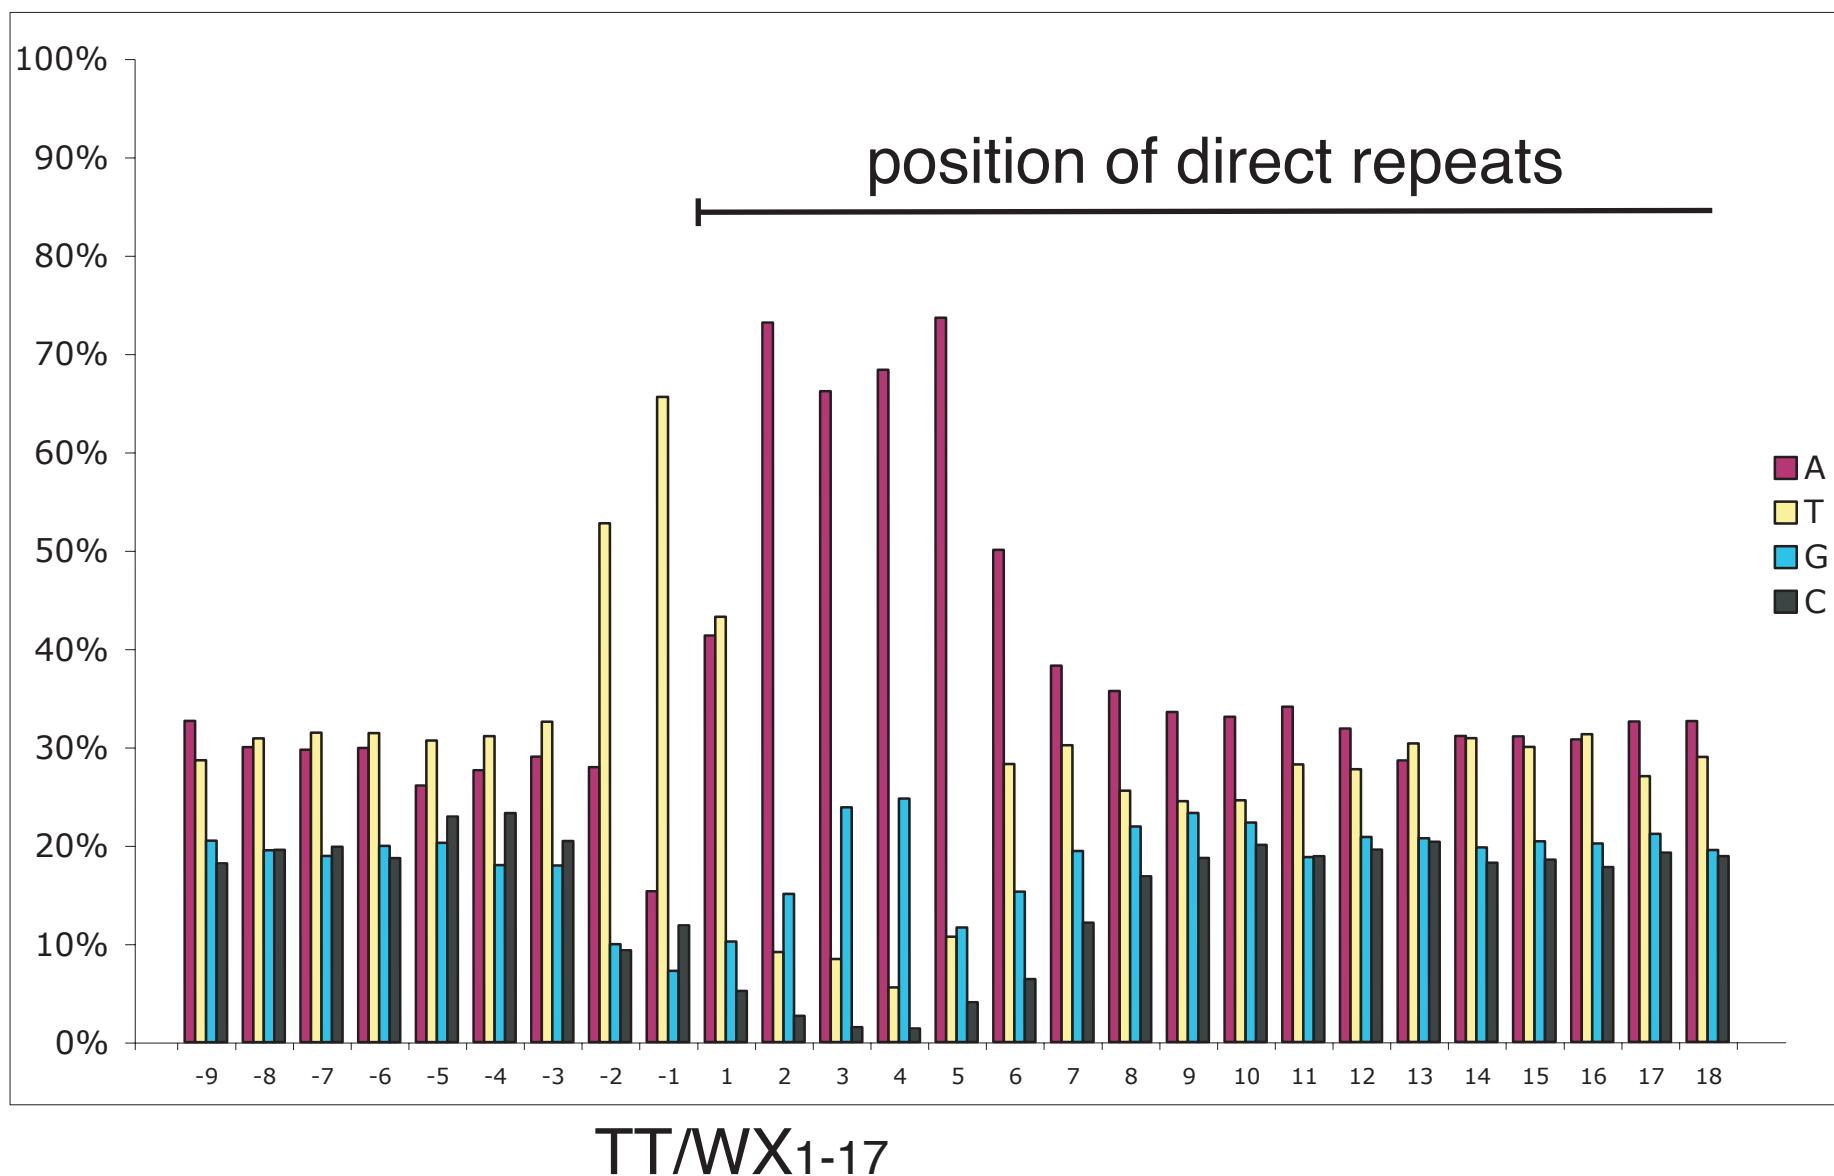

**Supplementary Figure 3 online: Percentage nucleotide composition around the integration site for all tRNA-related tailless retropseudogenes**  
 Red bars indicate adenine, yellow bars thymine, blue bars guanine, and black bars cytosine. The tailless retropseudogenes integration motifs are shown below the bars.
